# Supplementary material
Source: PubMed Central journal article supplement (PMC7685749)
Supplement: jci-130-136105-s276.pdf [file jci-130-136105-s276.pdf]

1 Supplemental Material

2 Supplemental Figures

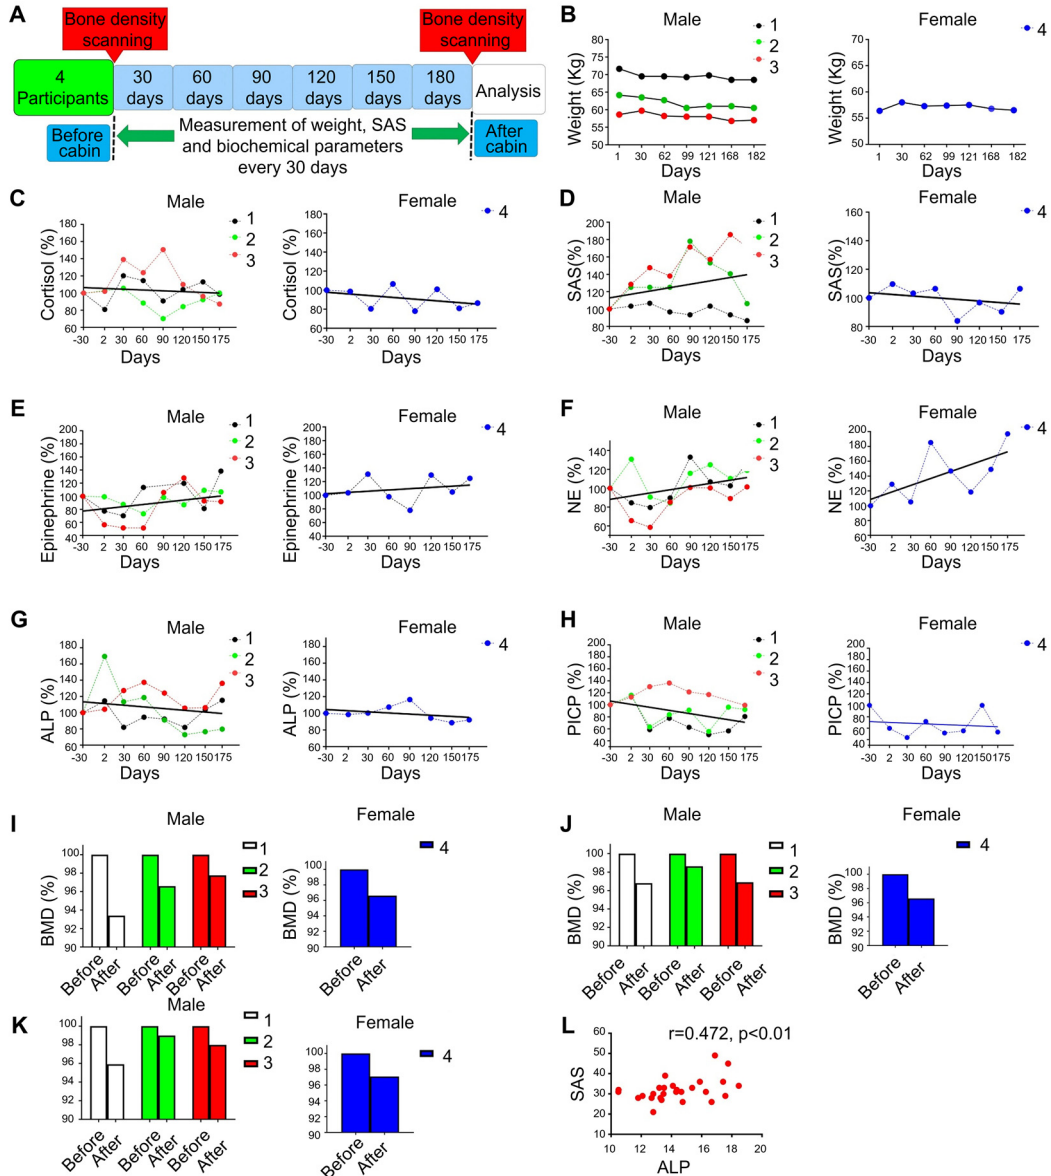

3

4 Supplemental Figure 1. Chronic stress in four crewmembers resulted in decreased  
5 bone density and elevated anxiety levels

6 (A) Schematic showing the experimental protocol used in the 180-day Controlled  
7 Ecological Life Support System integrated experiment. Biochemical parameters were  
8 measured every 30 days for all crewmembers. Bone mineral density (BMD) was

1 measured before and after the experiment. **(B)** During the mission, normal body weight  
2 was maintained in three male and one female participants. **(C)** Cortisol levels of three  
3 male and one female participants at 30-day intervals during the mission (n=4). **(D)** The  
4 Self-Rating Anxiety Scale (SAS) scores of three male and one female participants every  
5 30 days during the prolonged stay in the confined space (n=4). **(E)** Epinephrine levels  
6 of three male and one female participants every 30 days during the confined isolation  
7 (n=4). **(F)** Norepinephrine (NE) levels of three male and one female participants every  
8 30 days during the confined isolation (n=4). **(G)** Bone formation marker alkaline  
9 phosphatase (ALP) levels of three male and one female participants every 30 days  
10 during the confined isolation (n=4). **(H)** Procollagen I carboxy-terminal propeptide  
11 (PICP) levels of three male and one female participants at 30-day intervals during the  
12 mission (n=4). **(I)** BMD in femur of three male and one female participants before and  
13 after confinement. **(J)** BMD in the femoral neck of three male and one female  
14 participants before and after confinement. **(K)** BMD in the 2nd lumbar vertebrae of  
15 three male and one female participants before and after the confinement. **(L)**  
16 Correlation analysis using alkaline phosphatase (ALP) and Self-Rating Anxiety Scale  
17 (SAS) scores that reflect the level of anxiety, n=4.

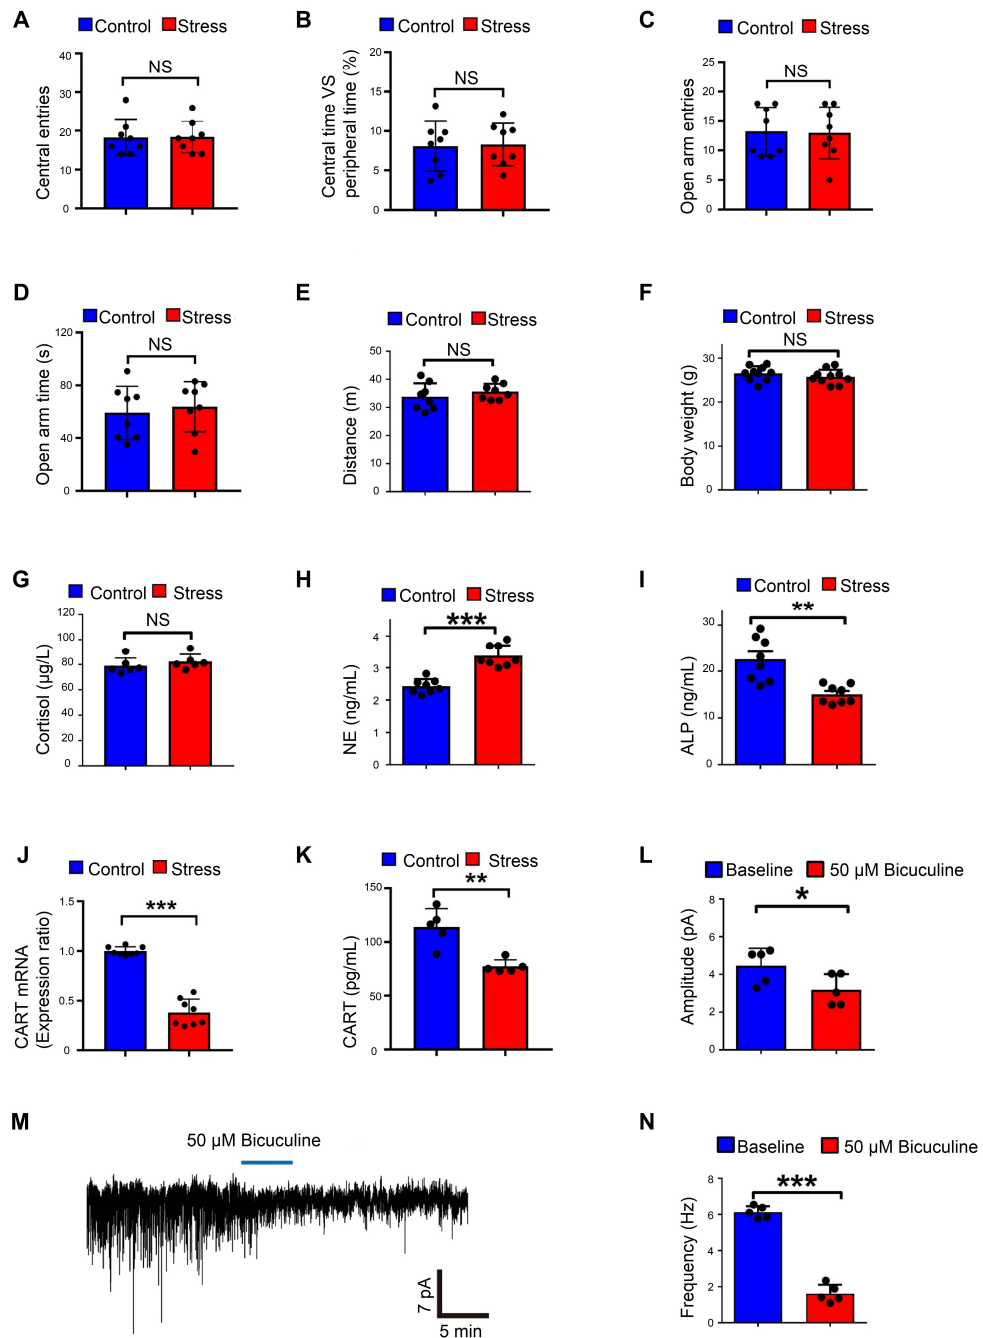

1

2 **Supplemental Figure 2. Biochemical parameters of mice in stress and control**

3 **groups**

4 **(A-B)** OF test comparing the baselines of control and stress groups. Entries to, and time

5 spent in, the central area were similar between the control and stress groups. Values

6 represent mean  $\pm$  SD (n=8 per group; NS, not significant; Student's t test). **(C-D)** EPM

1 test comparing the baselines of control and stress groups. Time in the open arm and  
2 open-arm entries were similar between the control and stress groups. Values represent  
3 mean  $\pm$  SD (n=8 per group; NS, not significant; Student's t test). **(E)** Total distance  
4 traveled in the OF test for stress and control groups. Values represent mean  $\pm$  SD (n=8  
5 per group; NS, not significant; Student's t test). **(F)** Body weight of mice in the stress  
6 and control groups. Values represent mean  $\pm$  SD (n=8 per group; NS, not significant;  
7 Student's t test). **(G)** Cortisol levels in stress and control groups. Values represent mean  
8  $\pm$  SD (n=6 per group; NS, not significant; Student's t test). **(H)** Quantification of the  
9 norepinephrine (NE) of stress and control groups. Values represent mean  $\pm$  SD (n=8 per  
10 group; \*\*\* $p$ <0.001; Student's t test). **(I)** Quantification of alkaline phosphatase (ALP)  
11 of stress and control groups. Values represent mean  $\pm$  SD (n=8 per group; \*\* $p$ <0.05;  
12 Student's t test). **(J)** Gene expression analysis of *CART* in VMHdm from mice in control  
13 and stress groups. Values represent mean  $\pm$  SD (n=8 per group; \*\*\* $p$ <0.001; Student's  
14 t test). **(K)** Quantification of CART levels in VMHdm of control and stress groups.  
15 Values represent mean  $\pm$  SD (n=5 per group; \*\* $p$ <0.01; Student's t test). **(L)**  
16 Bicuculline (50  $\mu$ M) blocked the increased amplitude of IPSCs in the stress group.  
17 Values represent mean  $\pm$  SD (n=5 per group; \*\*\* $p$ <0.001; Student's t test). **(M)** IPSCs  
18 in the stress group was completely blocked by bicuculline (50  $\mu$ M). **(N)** Bicuculline (50  
19  $\mu$ M) blocked the increased frequency of IPSCs in the stress group. Values represent  
20 mean  $\pm$  SD (n=5 per group; \*\*\* $p$ <0.001; Student's t test). CART, cocaine-amphetamine  
21 related transcript. IPSCs, inhibitory postsynaptic currents.

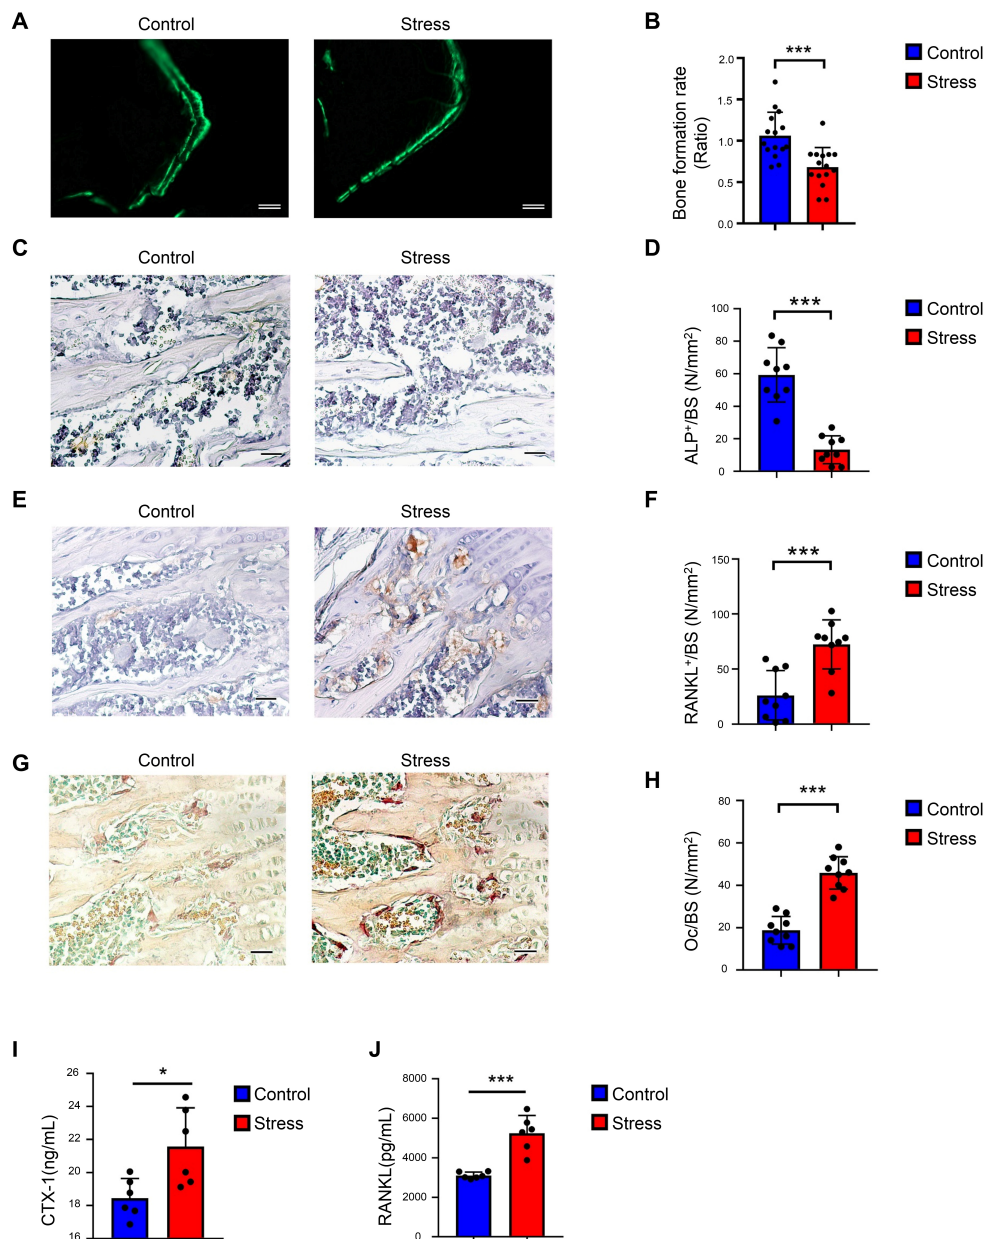

1  
 2 **Supplemental Figure 3. Chronic stress inhibited bone formation and increased**  
 3 **bone resorption in mice**

4 (A) In vivo calcein labeling of new bone formation in the control and stress groups.  
 5 Scale bar=150 μm. (B) Calculation of bone formation rate in the control and stress  
 6 groups (n=15 sections per group; \*\*\*p<0.01; Student's t test). (C) Alkaline phosphatase  
 7 (ALP) staining of trabecular bone in the control and stress groups. Staining of ALP was

1 weaker in the stress group compared to control group. Scale bar=150  $\mu\text{m}$ . **(D)**  
2 Quantification of ALP-positive osteoblasts per bone surface area (ALP<sup>+</sup>/BS) in  
3 trabecular bones from control and stress groups (n=9 per group; \*\*\* $p$ <0.01; Student's  
4 t test). **(E)** Immunostaining of Rankl in trabecular bone of the control and stress groups.  
5 The staining of Rankl was stronger in the stress group compared to the control group.  
6 Scale bar=150  $\mu\text{m}$ . **(F)** Quantification of Rankl-positive cells per bone surface area  
7 (RANKL<sup>+</sup>/BS) in trabecular bones from control and stress groups (n=9 per group;  
8 \*\*\* $p$ <0.01; Student's t test.) **(G)** Tartrate-resistant acid phosphatase (TRAP) staining in  
9 the stress and control groups. There was greater TRAP staining of trabecular bone in  
10 the stress group. Scale bar=150  $\mu\text{m}$ . **(H)** Quantification of the number of TRAP-positive  
11 osteoclasts per bone surface area (Oc/BS) in trabecular bones from control and stress  
12 groups (n=9 per group; \*\*\* $p$ <0.001; Student's t test). **(I)** Quantification of serum CTX-  
13 1 level in the control and stress groups (n=6 mice per group; \* $p$ <0.05; Student's t test).  
14 **(J)** Quantification of serum Rankl level in the control and stress groups (n=6 mice per  
15 group; \*\*\* $p$ <0.001; Student's t test).

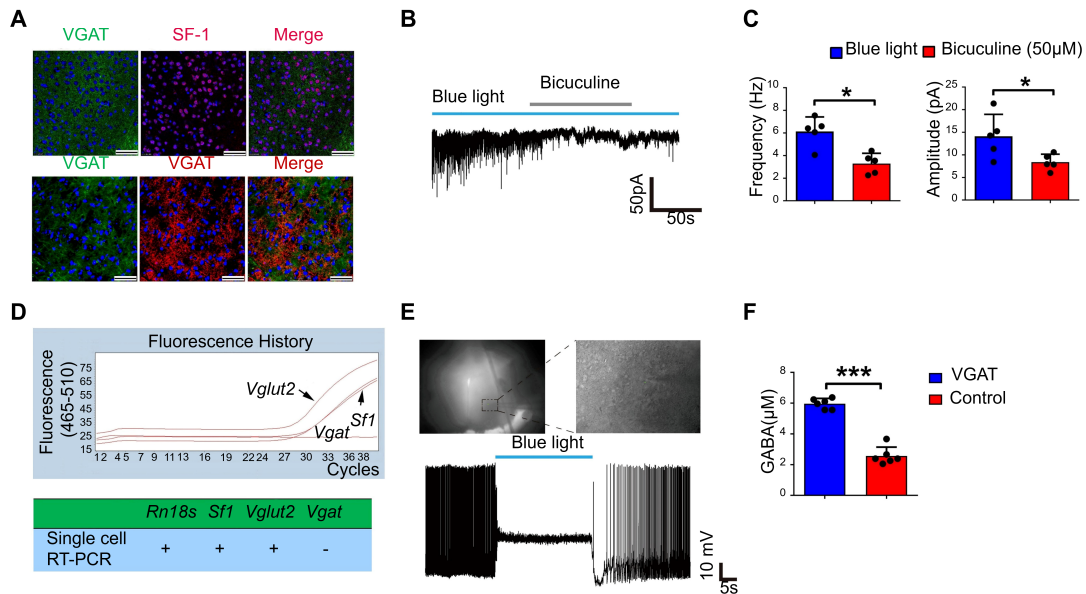

1

2 **Supplemental Figure 4. Activation of GABAergic projections in the VMHdm**  
 3 **inhibit the firing of SF1 neurons**

4 (A) High magnification image of VGAT signals surrounding SF1 neurons in the  
 5 VMHdm region (top) and double staining of VGAT and GAD65 revealed GABAergic  
 6 axon terminals in VMHdm (bottom). Scale bar, 50 μm. (B) An IPSC induced by blue  
 7 light was blocked by bicuculline (50 μM). (C) Quantification of IPSC frequency and  
 8 amplitude from SF1 neurons in the light stimulation and bicuculline groups. Both the  
 9 frequency and amplitude of the bicuculline-group IPSCs were significantly lower.  
 10 Values represent mean ± SD (n=5 per group; \**p*<0.05; Student's t test). (D) Single-cell  
 11 RT-PCR of the patched cells revealed gene expression of *Vglut2*, *Sf1* but not *Vgat* (n=5).  
 12 (E) Representative electrophysiological recording of the spontaneous firing of SF1  
 13 neurons after stimulation of the VMHdm with blue light in *VGAT* mice. (F)  
 14 Quantification of GABA levels in the VMHdm of *VGAT* and control groups. Values  
 15 represent mean ± SD (n=6 per group; \*\*\**p*<0.001; Student's t test).

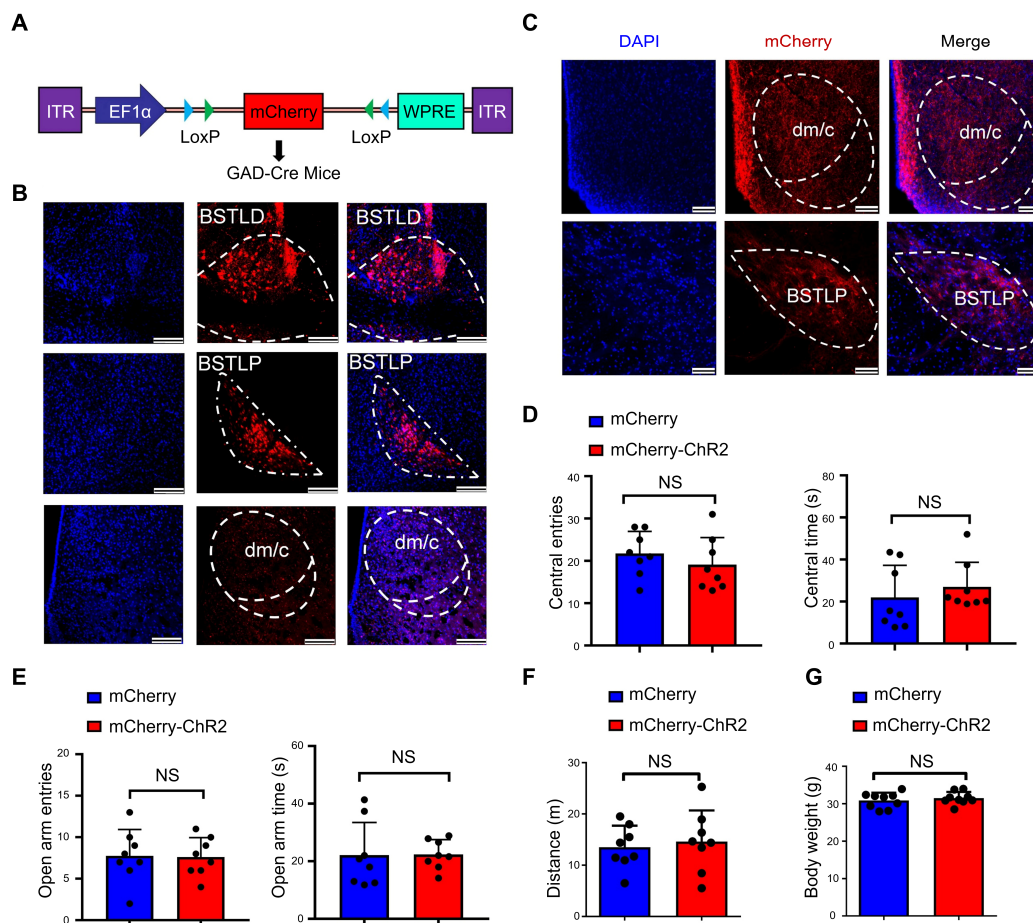

1

2 **Supplemental Figure 5. Somatostatin neurons in the BNST send GABAergic**  
 3 **projections to the VMHdm region**

4 **(A)** Schematic showing AAV-Ef1α-DIO-mcherry virus injections into the lateral dorsal  
 5 and lateral posterior region of BNST in *GAD-Cre* mice. **(B)** GABAergic neurons were  
 6 observed in the BSTLD and the BSTLP and GABAergic neural projections were  
 7 observed in the VMHdm (BSTLD, lateral-dorsal region of BNST; BSTLP, lateral  
 8 posterior region of BNST). Scale bar, 150  $\mu$ m **(C)** Representative image of SOM  
 9 positive neural projections in the VMHdm (top), and SOM positive neuron bodies in  
 10 the BSTLP (bottom) (BSTLP, LP region of BNST). Scale bar, 100  $\mu$ m. **(D)** OF test  
 11 comparing the baselines of mCherry-ChR2 and mCherry groups. Entries to, and time



1 spent in, the central area were similar between the mCherry-ChR2 and mCherry groups.  
2 Values represent mean  $\pm$  SD (n=8 per group; NS, not significant; Student's t test). **(E)**  
3 EPM test comparing the baselines of mCherry-ChR2 and mCherry groups. Time spent  
4 in the open arms and open-arm entries were similar between the mCherry-ChR2 and  
5 mCherry groups. Values represent mean  $\pm$  SD (n=8 per group; NS, not significant;  
6 Student's t test). **(F)** Total distance traveled in the OF test of the mCherry-ChR2 and  
7 mCherry groups. Values represent mean  $\pm$  SD (n=8 per group; NS, not significant;  
8 Student's t test). **(G)** Bodyweight of mice in the mCherry-ChR2 and mCherry groups.  
9 Values represent mean  $\pm$  SD (n=8 per group; NS, not significant; Student's t test).

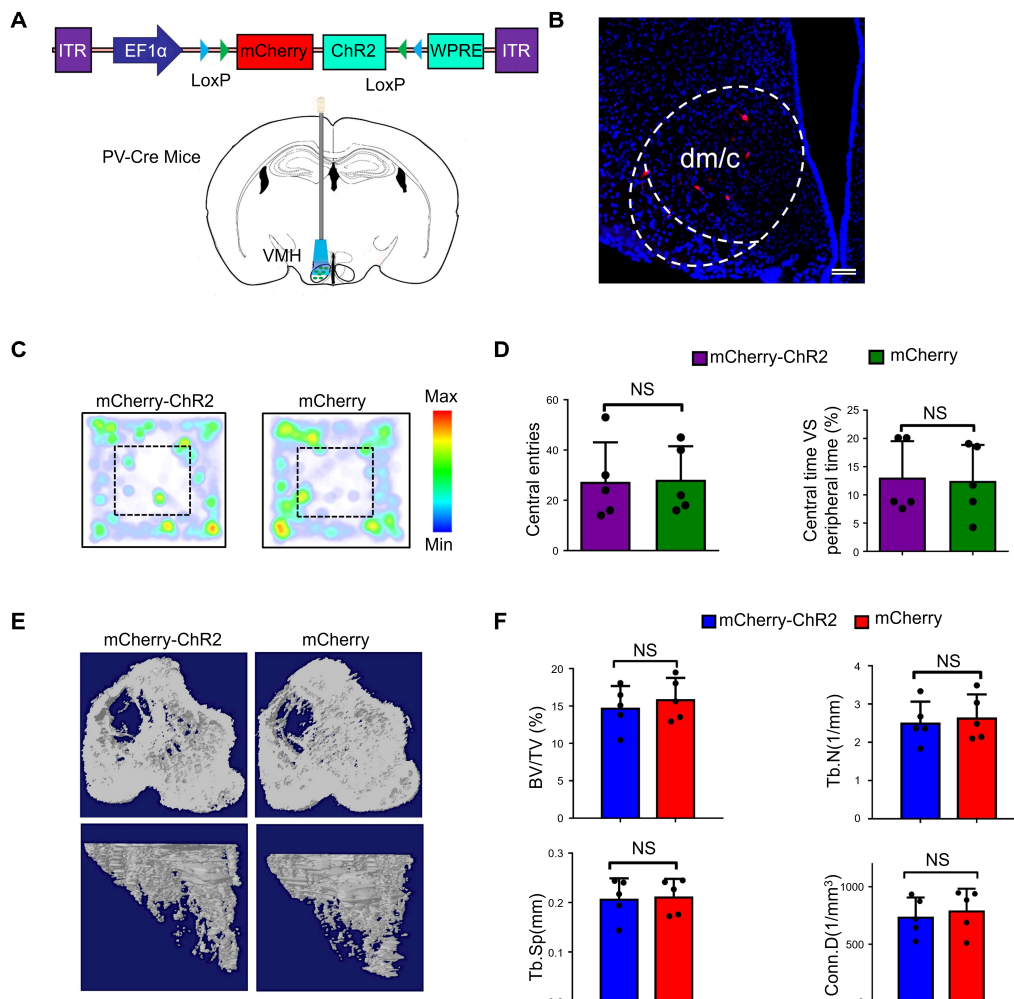

1  
2 **Supplemental Figure 6. Activation of parvalbumin neural projections in the VMH**  
3 **did not induce anxiety-like behavior or bone loss**  
4 (A) Schematic showing AAV-Ef1 $\alpha$ -DIO-ChR2-mCherry virus and optogenetically  
5 activation of parvalbumin-positive neural terminals in the VMHdm of *PV-Cre* mice. (B)  
6 The expression of ChR2-mCherry on parvalbumin neural projections. Scale bar, 100  $\mu$ m.  
7 (C) OF test for the mCherry-ChR2 and mCherry groups. (D) Entries to, and time spent  
8 in, the central area for the mCherry-ChR2 and mCherry groups. Values represent mean  
9  $\pm$  SD (n=5 per group; NS, not significant; Student's t test). (E) Representative micro-  
10 CT scans of bone structure in mCherry-ChR2 and mCherry groups. (F) MicroCT

1 analysis of the trabecular bone volume/tissue volume (BV/TV), the trabecular number  
2 (TbN), trabecular separation (Tb.Sp), and connectivity density (Conn. D) in mCherry-  
3 ChR2 and mCherry groups; values represent mean  $\pm$  SD (n=5 per group; NS, not  
4 significant; Student's t test).

5

6

7

8

9

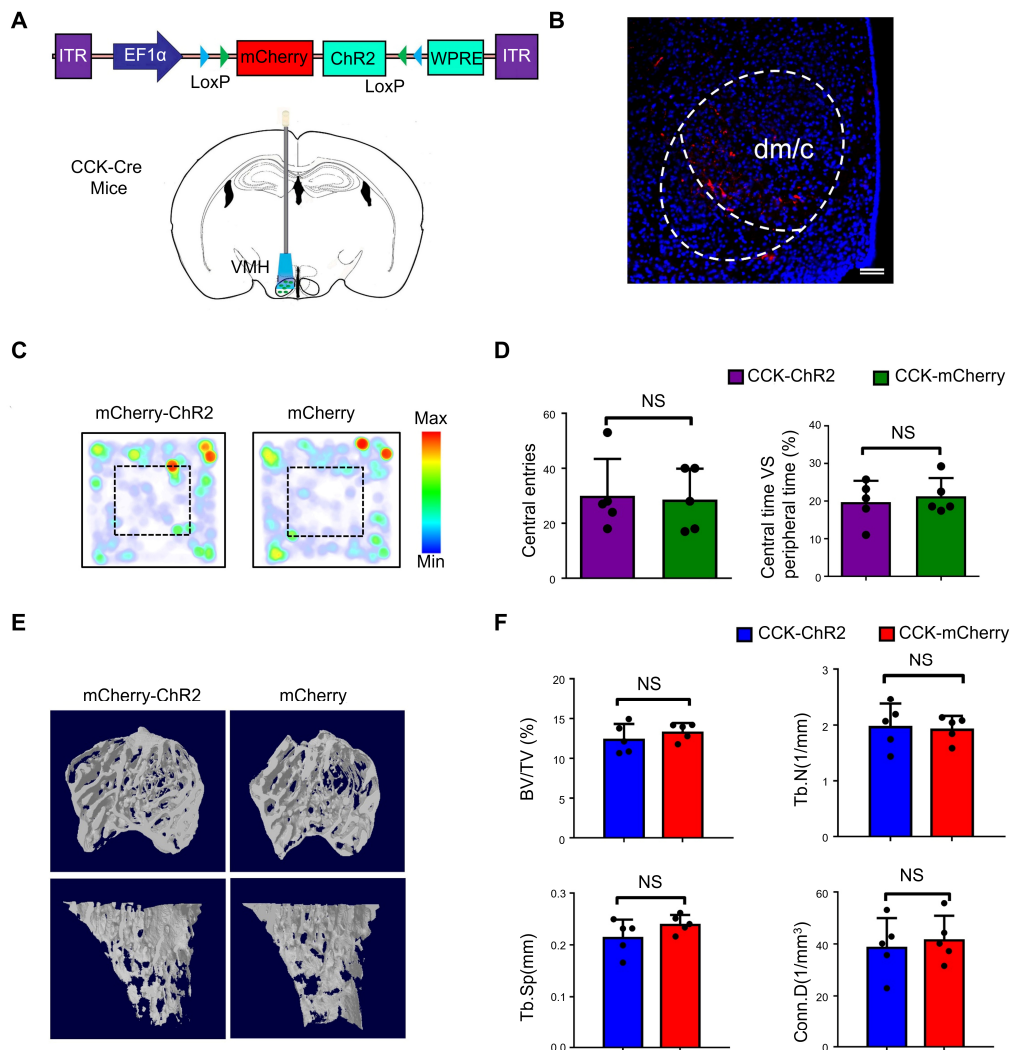

1

2 **Supplemental Figure 7. Activation of the Cholecystinin neural projection in the**

3 **VMH did not induce anxiety-like behavior or bone loss**

4 **(A)** Schematic showing AAV-Ef1 $\alpha$ -DIO-ChR2-mcherry and activation of

5 Cholecystinin (CCK)-positive neural terminals in the VMHdm of *CCK-Cre* mice. **(B)**

6 Expression of ChR2-mcherry on cholecystinin neural projections. Scale bar, 100  $\mu$ m.

7 **(C)** OF test comparing mCherry-ChR2 and mCherry groups. **(D)** Entries to, and time

8 spent in, the central area for the mCherry-ChR2 and mCherry groups. Values represent

9 mean  $\pm$  SD (n=5 per group; NS, not significant; Student's t test). **(E)** Representative

10 micro-CT scans of bone structure in the mCherry-ChR2 and mCherry groups. **(F)**

1 MicroCT analysis of the trabecular bone volume/tissue volume (BV/TV), the trabecular  
2 number (TbN), trabecular separation (Tb.Sp), and connectivity density (Conn. D) in the  
3 CCK-ChR2 and CCK-mCherry groups. Values represent mean  $\pm$  SD (n=5 per group;  
4 NS, not significant; Student's t test).

5

6

7

8

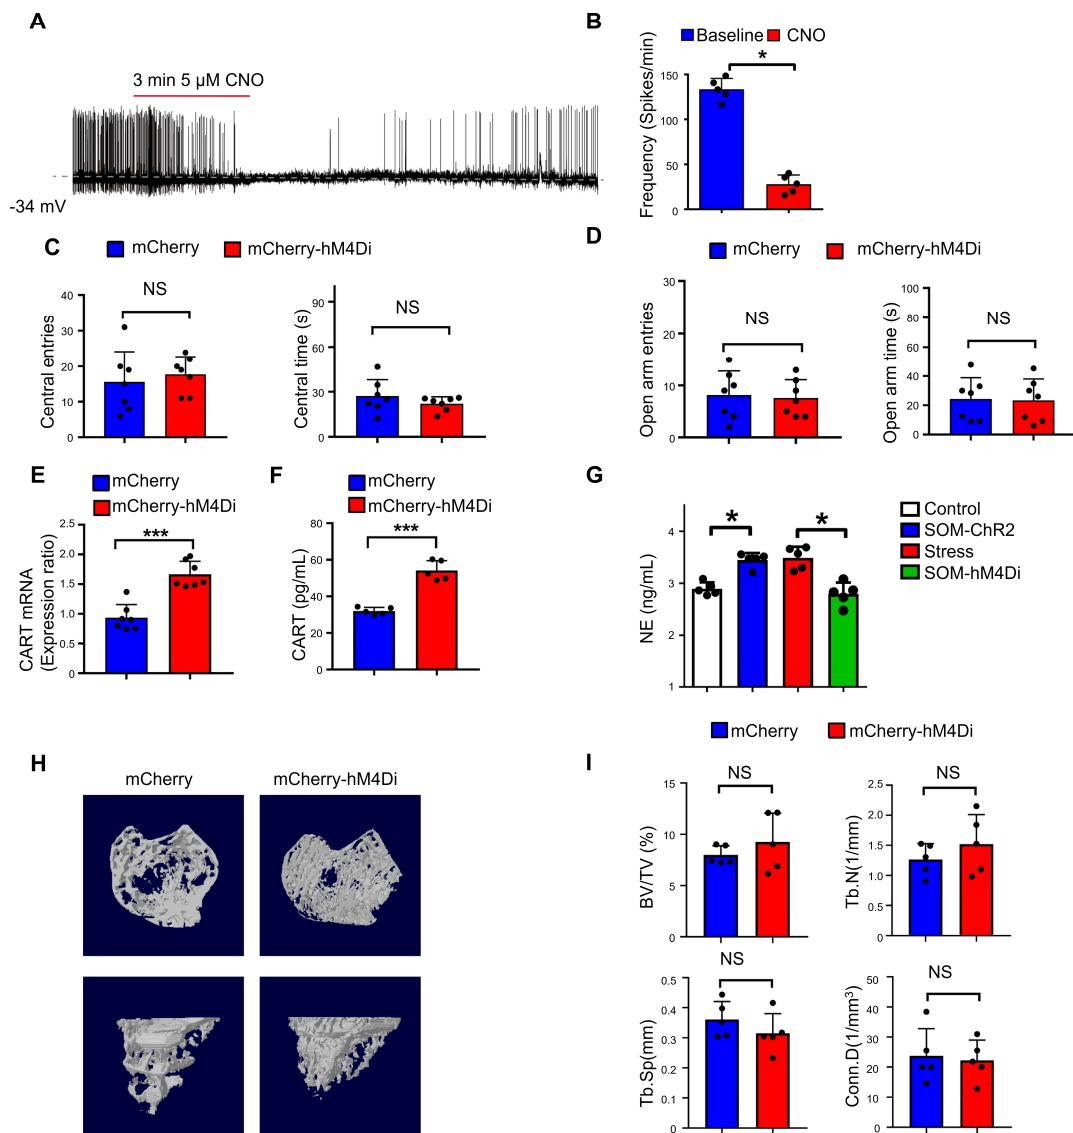

1

2 **Supplemental Figure 8. Somatostatin neurons are indispensable for stress-induced**  
 3 **bone loss**

4 (A) Representative electrophysiological recordings of somatostatin (SOM) neurons  
 5 selectively silenced using the DREADD technique. (B) Quantification of frequency  
 6 (spikes/min) from SOM neurons in the baseline and CNO groups. Values represent  
 7 mean  $\pm$  SD (n=5 per group; \* $p$ <0.05; Student's t test). (C) OF test comparing the  
 8 baselines of the mCherry and mCherry-hM4Di groups. Entries to, and time spent in,

1 the central area were similar between the mCherry and mCherry-hM4Di groups. Values  
2 represent mean  $\pm$  SD (n=7 per group; NS, not significant; Student's t test). **(D)** EPM  
3 test comparing the baseline of mCherry and mCherry-hM4Di groups. Time spent in the  
4 open arms and open-arm entries were similar between the mCherry and mCherry-  
5 hM4Di groups. Values represent mean  $\pm$  SD (n=7 per group; NS, not significant;  
6 Student's t test). **(E)** Gene expression analysis of *CART* in VMHdm from mice in the  
7 mCherry and mCherry-hM4Di groups. Values represent mean  $\pm$  SD (n=7 per group;  
8 \*\*\* $p$ <0.001; Student's t test). **(F)** Quantification of *CART* levels in VMHdm of  
9 mCherry and mCherry-hM4Di groups. Values represent mean  $\pm$  SD (n=5 per group;  
10 \*\*\* $p$ <0.001; Student's t test). **(G)** Quantification of norepinephrine (NE) levels  
11 comparing SOM-ChR2, stress, SOM-hM4Di and control groups. NE was significantly  
12 higher in both SOM-ChR2 and stress groups; however, it was significantly lower in the  
13 hM4Di group. Values represent mean  $\pm$  SD (n=5 mice per group; \* $p$ <0.05; one-way  
14 analysis of variance (ANOVA) with Bonferroni correction for multiple comparisons).  
15 **(H)** Micro-CT analysis of bone structure comparing non-stressed mCherry and  
16 mCherry-hM4Di groups after inhibition of SOM neurons. **(I)** MicroCT analysis of the  
17 trabecular bone volume/tissue volume (BV/TV), the trabecular number (TbN),  
18 trabecular separation (Tb.Sp), and connectivity density (Conn. D) in non-stressed  
19 mCherry and mCherry-hM4Di groups. Values represent mean  $\pm$  SD (n=5 per group; NS,  
20 not significant; Student's t test). *CART*, cocaine-amphetamine related transcript.

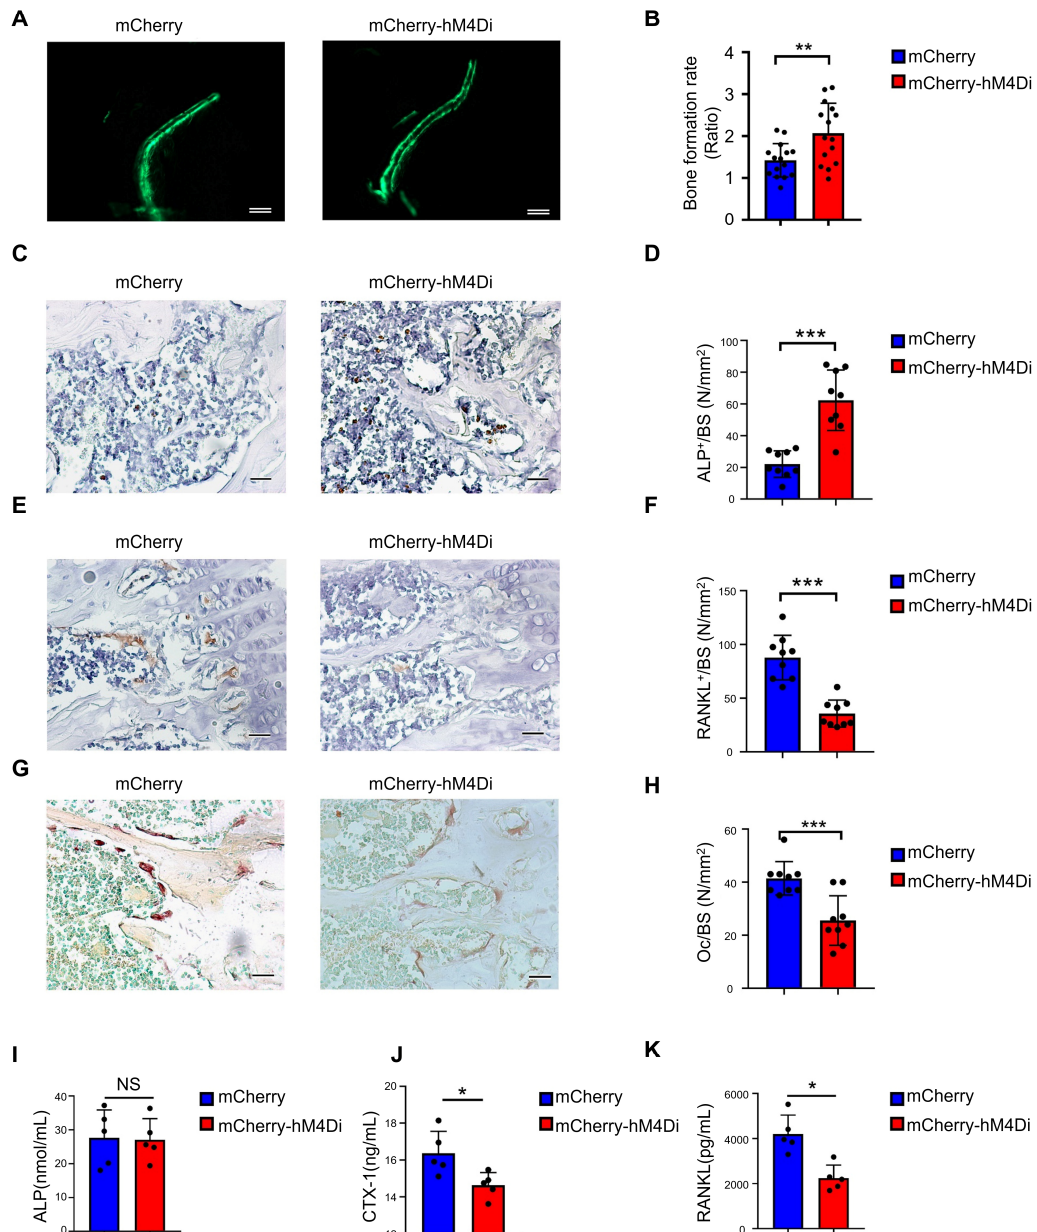

1

2 **Supplemental Figure 9. Inhibition of SOM-neuron activity increased bone**  
 3 **formation and inhibited bone resorption in mice**

4 **(A)** In vivo calcein labeling of new bone formation in the mCherry and mCherry-  
 5 hM4Di groups. Scale bar=150  $\mu$ m. **(B)** Calculation of bone formation rate in the  
 6 mCherry and mCherry-hM4Di groups (n=15 sections per group; \*\* $p$ <0.01; Student's t  
 7 test). **(C)** Alkaline phosphatase (ALP) staining of trabecular bone in the mCherry and



1 mCherry-hM4Di groups. The staining of ALP was stronger in the mCherry-hM4Di  
2 group than in the mCherry group. Scale bar=150  $\mu\text{m}$ . **(D)** Quantification of ALP-  
3 positive osteoblast per bone surface area (ALP<sup>+</sup>/BS) in trabecular bones from mCherry  
4 and mCherry-hM4Di groups (n=9 per group; \*\*\* $p$ <0.001; Student's t test). **(E)**  
5 Immunostaining of Rankl in trabecular bone of the mCherry and mCherry-hM4Di  
6 groups. The staining of Rankl was weaker in the mCherry-hM4Di group than in the  
7 mCherry group. Scale bar=150  $\mu\text{m}$ . **(F)** Quantification of Rankl-positive cells per bone  
8 surface area (RANKL<sup>+</sup>/BS) in trabecular bones from mCherry and mCherry-hM4Di  
9 groups (n=9 per group; \*\*\* $p$ <0.001; Student's t test). **(G)** Tartrate-resistant acid  
10 phosphatase (TRAP) staining in mCherry and mCherry-hM4Di groups. There was  
11 attenuated TRAP staining of trabecular bone in the mCherry-hM4Di group. Scale  
12 bar=150  $\mu\text{m}$ . **(H)** Quantification of the number of TRAP-positive osteoclasts per bone  
13 surface area (Oc/BS) in trabecular bones from the mCherry and mCherry-hM4Di  
14 groups (n=9 per group; \*\*\*  $p$ <0.001; Student's t test). **(I)** Quantification of serum ALP  
15 levels in the mCherry and mCherry-hM4Di groups (n=5 mice per group; NS, not  
16 significant; Student's t test). **(J)** Quantification of serum CTX-1 levels in the mCherry  
17 and mCherry-hM4Di groups (n=5 mice per group; \* $p$ <0.05; Student's t test). **(K)**  
18 Quantification of serum Rankl levels in the mCherry and mCherry-hM4Di groups (n=5  
19 mice per group; \* $p$ <0.05; Student's t test).

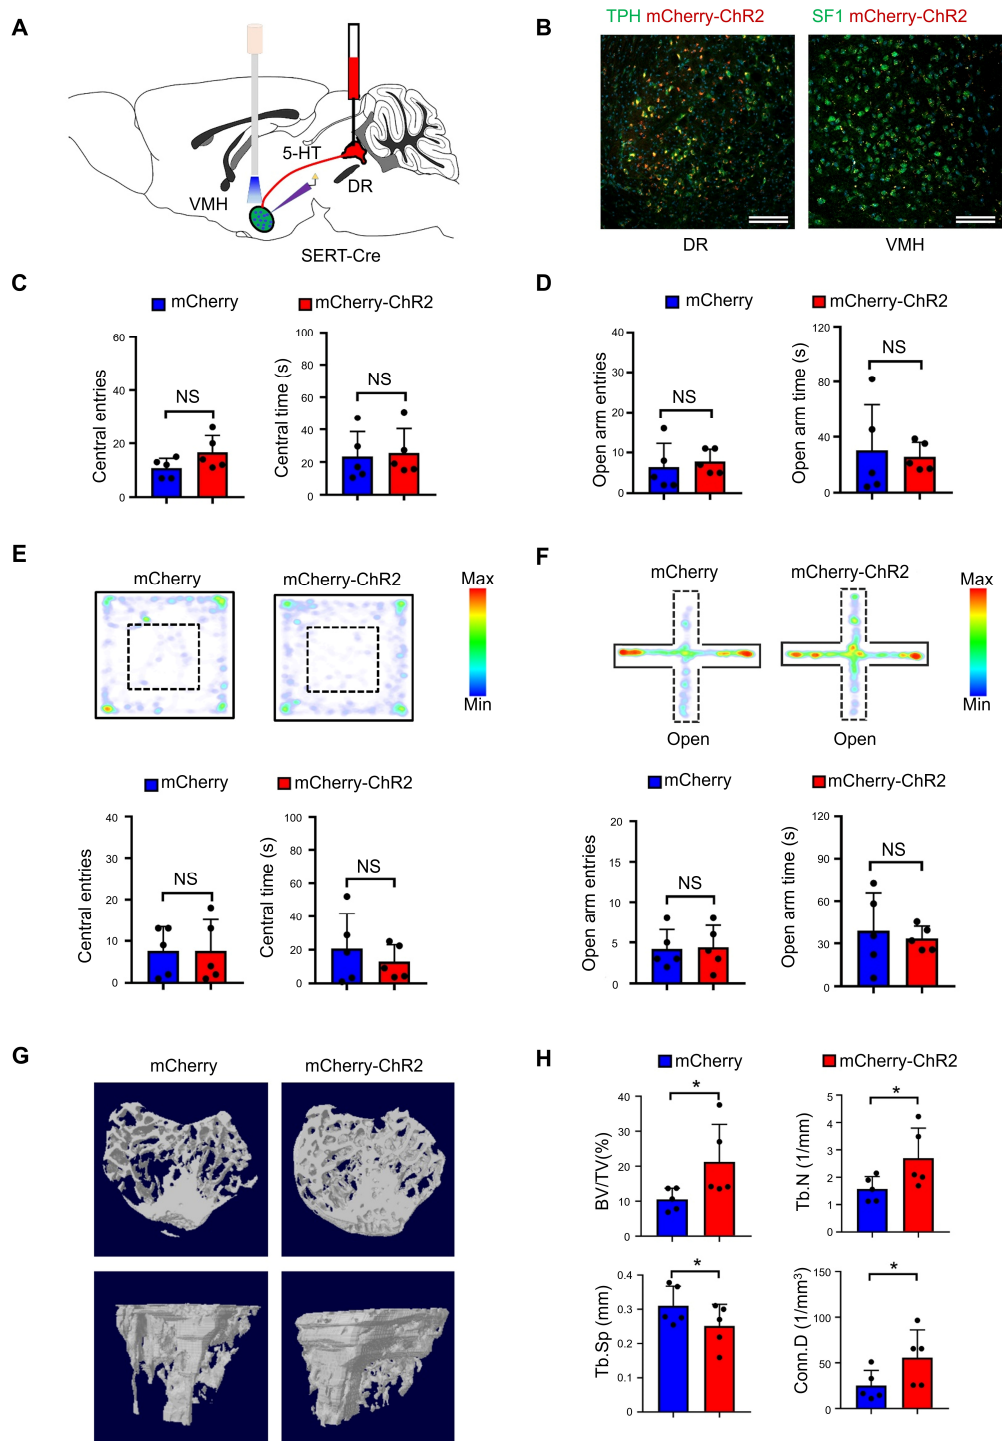

1

2 **Supplemental Figure 10. Activation of the serotonergic neural projection from the**  
 3 **dorsal raphe nucleus to the VMH arrested stress-induced bone loss but not anxiety.**

4 (A) Schematic showing AAV-Ef1 $\alpha$ -DIO-ChR2-mCherry virus injected into the dorsal  
 5 raphe region of *SERT-Cre* mice. Blue light was used to illuminate the VMHdm region

1 containing serotonergic neural terminals. **(B)** Representative image of labeled  
2 serotonergic positive neurons (yellow) in the dorsal raphe nucleus (DR) (left) and  
3 serotonergic-positive neural projections (yellow) in the VMHdm (right) after injection  
4 into the DR region. Scale bar, 100  $\mu$ m. **(C)** OF test comparing the baselines of mCherry-  
5 ChR2 and mCherry groups before light stimulation. Entries to, and time spent in, the  
6 central area were similar between the mCherry-ChR2 and mCherry groups. Values  
7 represent mean  $\pm$  SD (n=5 per group; NS, not significant; Student's t test). **(D)** EPM  
8 test comparing the baselines of the mCherry-ChR2 and mCherry groups before light  
9 stimulation. Time spent in the open arms and open-arm entries were similar between  
10 the mCherry-ChR2 and mCherry groups. Values represent mean  $\pm$  SD (n=5 per group;  
11 NS, not significant; Student's t test). **(E)** OF test comparing mCherry-ChR2 and  
12 mCherry groups during blue-light stimulation. Entries to, and time spent in, the central  
13 area were similar between the mCherry-ChR2 and mCherry groups. Values represent  
14 mean  $\pm$  SD (n=5 per group; NS, not significant; Student's t test). **(F)** EPM test  
15 comparing mCherry-ChR2 and mCherry groups during blue-light stimulation. Time  
16 spent in the open arms and open-arm entries were similar between the mCherry-ChR2  
17 and mCherry groups. Values represent mean  $\pm$  SD (n=5 per group; NS, not significant;  
18 Student's t test). **(G)** Micro-CT analysis of the bone structure of mCherry-ChR2 and  
19 mCherry groups 4 wk after light stimulation began. A significantly higher bone-mass  
20 phenotype was observed in the mCherry-ChR2 group than in the mCherry group. **(H)**  
21 MicroCT analysis of the trabecular bone volume/tissue volume (BV/TV), the trabecular  
22 number (TbN), trabecular separation (Tb.Sp), and connectivity density (Conn.D) in

1 mCherry-ChR2 and mCherry groups. Values represent mean  $\pm$  SD (n=5 per group;

2 \* $p$ <0.05; Student's t test).

3

4

5

6

7

8

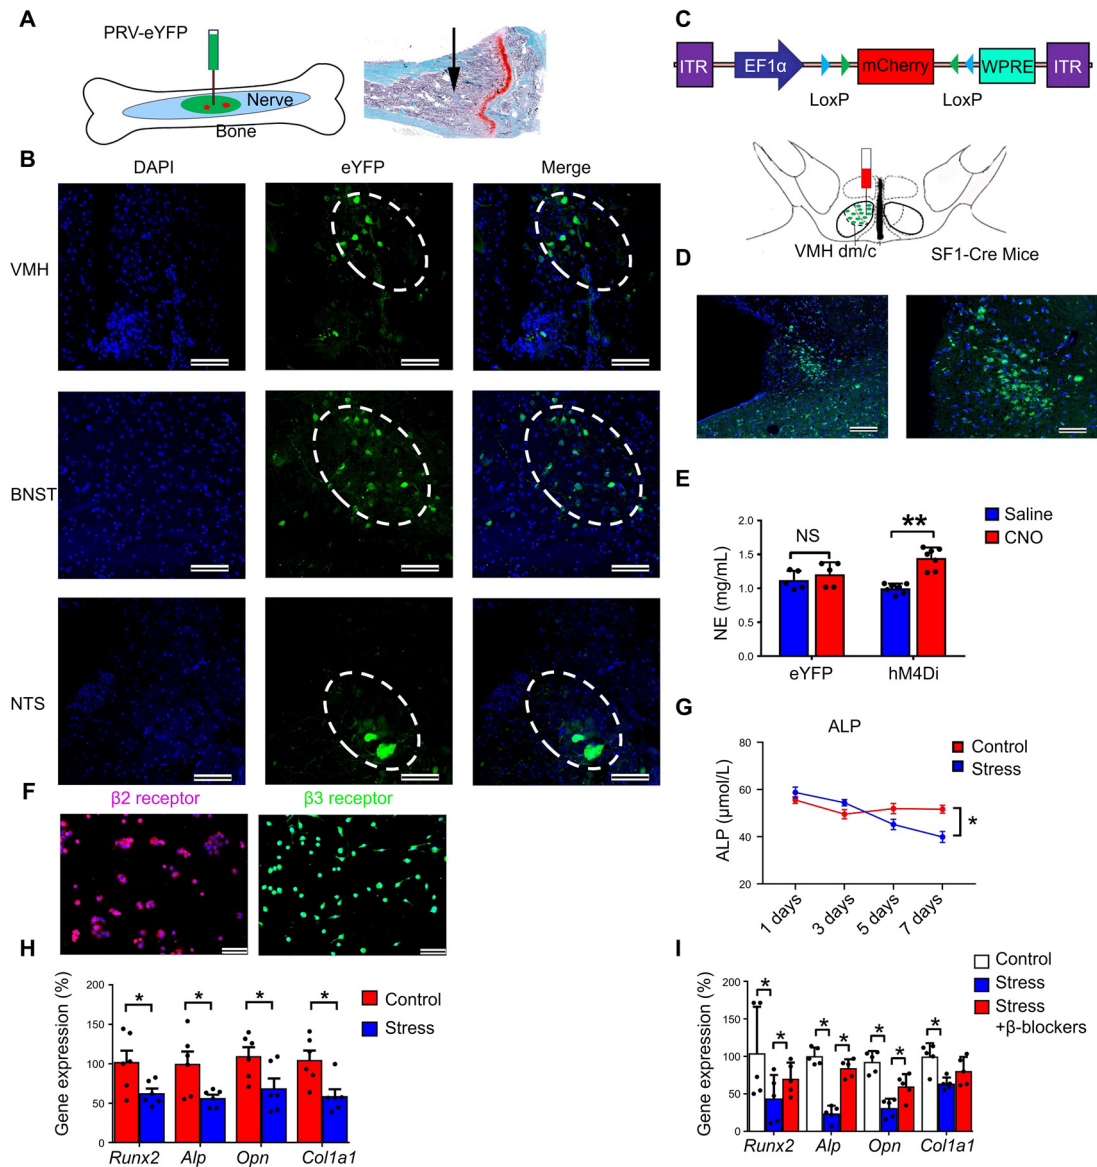

1

2 **Supplemental Figure 11. Sympathetic system and NE-mediated BNST-VMH-NTS**  
 3 **neural circuitry-induced bone loss**

4 **(A)** Schematic showing poly-synaptic retrograde PRV virus injected into murine bone  
 5 marrow to label neurons innervating the bone (left); safranin-O staining of the mouse  
 6 tibia (right). **(B)** eYFP labeled neurons were observed in the ventromedial  
 7 hypothalamus (VMH), bed nucleus of the stria terminalis (BNST) and nucleus of the  
 8 solitary tract (NTS). Scale bar, 50  $\mu$ m. **(C)** Schematic showing AAV expressing  
 9 mCherry under the EF1 $\alpha$  promoter. The virus was injected into the dorsomedial region

1 of the VMH in *SF-Cre* mice. **(D)** Expression of hM4di (green) in Vglut2 neurons in  
2 solM region of the NTS. Scale bar, 100  $\mu$ m (left), 50  $\mu$ m (right). **(E)** Quantification of  
3 norepinephrine (NE) levels in the eYFP and hM4Di groups. NE was significantly  
4 higher in hM4Di group than in the saline group after CNO injection. Values represent  
5 mean  $\pm$  SD (n=5 mice per group; NS, not significant; \*\* $p$ <0.01; one-way analysis of  
6 variance (ANOVA) with Bonferroni correction for multiple comparisons test). **(F)**  
7 Immunostaining of  $\beta$ 2 and  $\beta$ 3 adrenergic receptors on osteoprogenitor cells. Scale bar,  
8 50  $\mu$ m. **(G)** Quantification of alkaline phosphatase (ALP) during osteoblastic  
9 differentiation of osteoprogenitors using serum from control and stress groups  
10 respectively. Values represent mean  $\pm$  SD (n=5 per group; \* $p$ <0.05; Student's t test). **(H)**  
11 RT-PCR analysis of *Runx2*, *Alp*, *Colla1*, and *Opn* after 2 wk of osteogenic  
12 differentiation of osteoprogenitor cells using serum from control and stress groups  
13 respectively. Values represent mean  $\pm$  SD (n=6 mice per group; \* $p$ <0.05; \*\* $p$ <0.01;  
14 one-way analysis of variance (ANOVA) with Bonferroni correction for multiple  
15 comparisons). **(I)** Gene expression analysis of *Runx2*, *Alp*, *Colla1*, and *Opn* using  
16 freshly isolated bone marrow cells from mice in the stress, control and stress +  $\beta$ -  
17 blockers groups. Values represent mean  $\pm$  SD (n=5 mice per group; \* $p$ <0.05; one-way  
18 analysis of variance (ANOVA) with Bonferroni correction for multiple comparisons  
19 test).

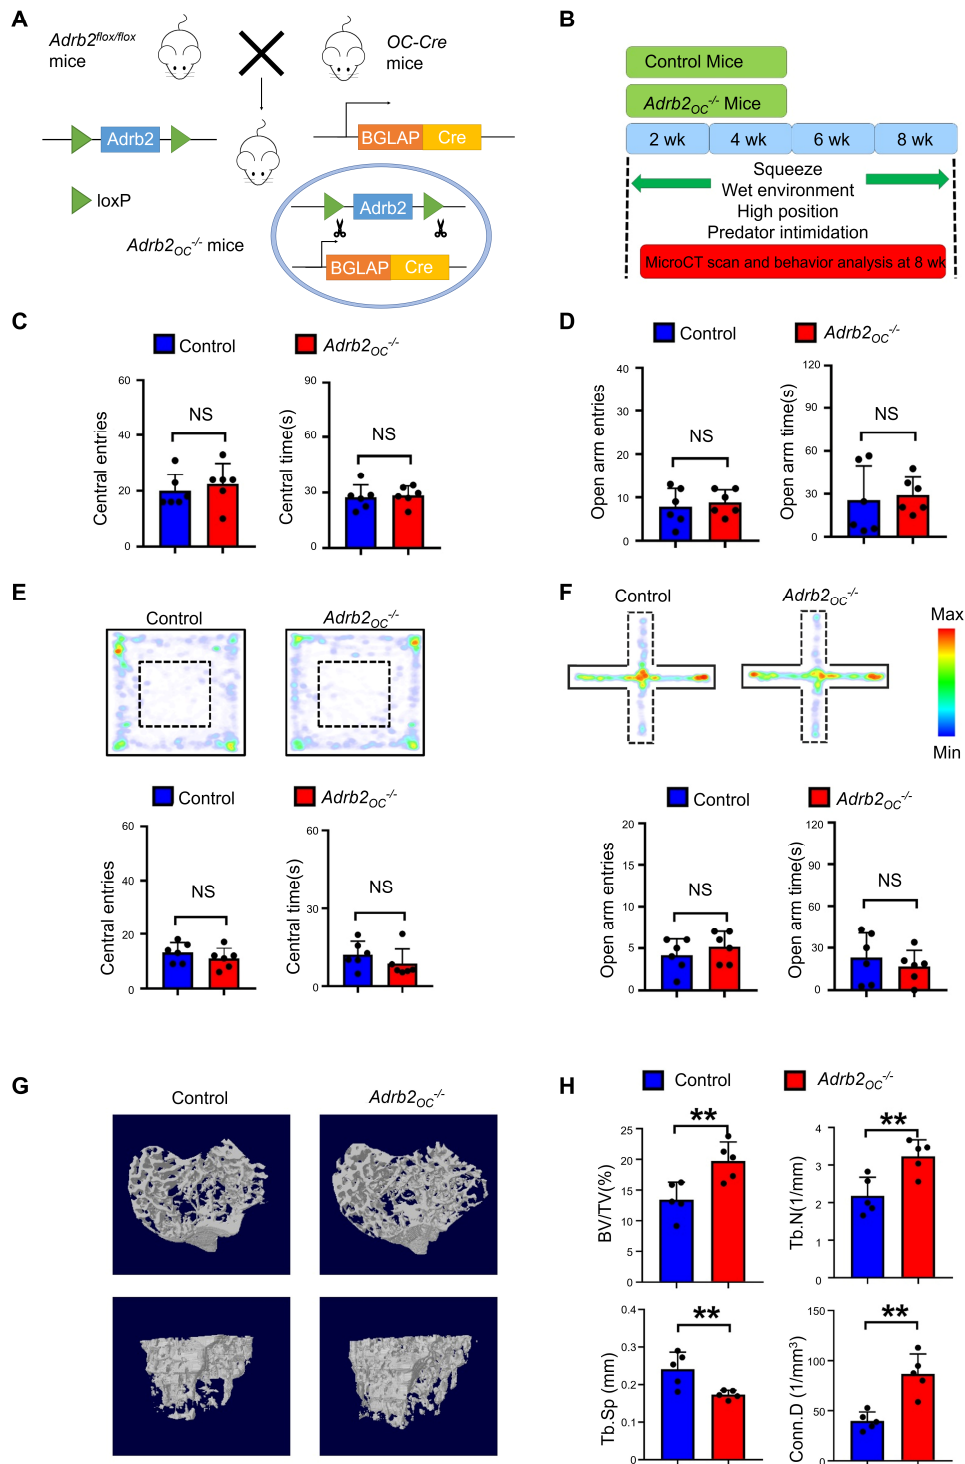

1

2 **Supplemental Figure 12. Conditional deletion of *Adrb2* in osteoblasts arrests**  
 3 **stress-induced bone loss**

4 (A) *Adrb2<sup>oc-/-</sup>* mice were generated by crossing heterozygote *OC-Cre* mice with  
 5 homozygote *Adrb2*-floxed mice. *Adrb2<sup>oc-/-</sup>* mice were obtained by crossing *Adrb2<sup>oc-/-</sup>*

1 with homozygote *Adrb2-floxed* mice. **(B)** *Adrb2oc<sup>-/-</sup>* mice and control mice were  
2 exposed to chronic stressors for 8 weeks, then behavioral tests and bone analysis were  
3 conducted at the end of the 8 weeks. **(C)** OF test comparing the baselines of control and  
4 *Adrb2oc<sup>-/-</sup>* groups. Entries to, and time spent in, the central area were similar between  
5 control and *Adrb2oc<sup>-/-</sup>* groups. Values represent mean  $\pm$  SD (n=6 per group; NS, not  
6 significant; Student's t test). **(D)** EPM test comparing the baselines of *Adrb2oc<sup>-/-</sup>* and  
7 control groups. Time spent in the open arms and open-arm entries were comparable  
8 between control and *Adrb2oc<sup>-/-</sup>* groups. Values represent mean  $\pm$  SD (n=6 per group;  
9 NS, not significant; Student's t test). **(E)** OF test comparing control and *Adrb2oc<sup>-/-</sup>*  
10 groups after the chronic stress. Entries to, and time spent in, the central area were similar  
11 between control and *Adrb2oc<sup>-/-</sup>* groups. Values represent mean  $\pm$  SD (n=6 per group;  
12 NS, not significant; Student's t test). **(F)** EPM test comparing *Adrb2oc<sup>-/-</sup>* and control  
13 groups after chronic stress. Time spent in the open arms and open-arm entries were  
14 similar between control and *Adrb2oc<sup>-/-</sup>* groups. Values represent mean  $\pm$  SD (n=6 per  
15 group; NS, not significant; Student's t test). **(G)** Micro-CT analysis of bone structure of  
16 control and *Adrb2oc<sup>-/-</sup>* groups 8 weeks after chronic stress. A significantly higher bone-  
17 mass phenotype was observed in *Adrb2oc<sup>-/-</sup>* group than in the control group. **(H)**  
18 MicroCT analysis of trabecular bone volume/tissue volume (BV/TV), the trabecular  
19 number (TbN), trabecular separation (Tb.Sp), and connectivity density (Conn. D) in  
20 control and *Adrb2oc<sup>-/-</sup>* groups. Values represent mean  $\pm$  SD (n=5 per group; \*\* $p$ <0.01;  
21 Student's t test)

22



1 **Table 1**

2

|                                                            | BMD Changes Rate (A-B)/B*100% |          |          |          |                |           |
|------------------------------------------------------------|-------------------------------|----------|----------|----------|----------------|-----------|
| <b>Participants</b>                                        | <b>1</b>                      | <b>2</b> | <b>3</b> | <b>4</b> | <b>Average</b> | <b>SD</b> |
| <b>Lumbar 1</b>                                            | -0.25%                        | 4.53%    | -4.06%   | 1.02%    | <b>0.31%</b>   | 3.55%     |
| <b>Lumbar 2</b>                                            | -4.10%                        | -1.01%   | -2.01%   | -2.92%   | <b>-2.51%</b>  | 1.32%     |
| <b>Lumbar 3</b>                                            | -5.64%                        | 0.34%    | 1.80%    | -1.87%   | <b>-1.34%</b>  | 3.24%     |
| <b>Lumbar 4</b>                                            | -1.82%                        | -2.59%   | 2.96%    | 0.08%    | <b>-0.34%</b>  | 2.47%     |
| <b>L1-L2</b>                                               | -2.29%                        | 1.63%    | -2.84%   | -0.98%   | <b>-1.12%</b>  | 1.99%     |
| <b>L1-L3</b>                                               | -3.56%                        | 1.20%    | -1.18%   | -1.36%   | <b>-1.23%</b>  | 1.95%     |
| <b>L1-L4</b>                                               | -3.13%                        | 0.00%    | 0.08%    | -0.98%   | <b>-1.01%</b>  | 1.49%     |
| <b>L2-L3</b>                                               | -4.89%                        | -0.27%   | 0.00%    | -2.44%   | <b>-1.9%</b>   | 2.27%     |
| <b>L2-L4</b>                                               | -3.77%                        | -1.14%   | 1.13%    | -1.59%   | <b>-1.34%</b>  | 2.01%     |
| <b>L3-L4</b>                                               | -3.63%                        | -1.20%   | 2.47%    | -0.85%   | <b>-0.80%</b>  | 2.51%     |
| <b>Femoral neck</b>                                        | -11.23%                       | -1.37%   | -3.10%   | -4.43%   | <b>-5.03%</b>  | 4.32%     |
| <b>Femur</b>                                               | -6.61%                        | -3.40%   | -2.24%   | -3.39%   | <b>-3.91%</b>  | 1.88%     |
| <b>Radius</b>                                              | -0.27%                        | -2.17%   | 0.28%    | -2.56%   | <b>-1.18%</b>  | 1.39%     |
| <b>Unla</b>                                                | 1.80%                         | -4.29%   | 0.38%    | -0.77%   | <b>-0.72%</b>  | 2.60%     |
| BMD: Bone Mineral Density; B: before cabin; A: after cabin |                               |          |          |          |                |           |

3 **Table 1. Changes in bone mineral density (BMD) in different anatomical regions**  
 4 **in the four crewmembers after the experiment**

5

6

7

8

9

10

11

12

13

14

## 1 **Supplemental Methods**

### 2 *Virus injection and light stimulation*

3 Mice were anesthetized with pentobarbital sodium (i.p., 100 mg/kg), and then fixed in  
4 a stereotaxic apparatus (RWD, China). During surgery and virus injections, mice were  
5 kept anesthetized with isoflurane (1%). The skull above targeted areas was thinned with  
6 dental drill. A microsyringe pump (UMP3/Micro4, USA) was employed to conduct the  
7 virus injections with a 10  $\mu$ l syringe connected to a 33G needle (Neuros; Hamilton,  
8 Reno, USA). For optogenetic activation, 300 nl AAV5-DIO-ChR2-mCherry ( $10^9$   
9 TU/ml) or AAV5-DIO-mCherry ( $10^9$  TU/ml) was injected into the BNST region (AP=  
10 0.22 mm; ML= $\pm$ 0.75 mm; DV=-4.5 mm) of *SOM-Cre* mice; or the Dorsal Raphe region  
11 (AP=-4.36 mm; ML= 0.18 mm; DV=-2.10 mm) of *SERT-Cre* mice. All mice were  
12 housed for four to six weeks following injection for viral expression before initiation  
13 of experiments.

14

15 For optical terminal stimulation, custom-made optic fiber cannulae (200  $\mu$ m diameter,  
16 0.37 NA. fiber with 1.25 mm ceramic ferrule; NEWDOON, Hangzhou) were implanted  
17 unilaterally above the VMH (AP=-1.58 mm; ML= $\pm$ 0.3 mm; DV=-5.35 mm) of *SOM-*  
18 *Cre* mice or *SERT-Cre* mice four weeks after virus injection in the BNTS or Dorsal  
19 Raphe, respectively. Dental cement was applied to cover the exposed skull completely  
20 and to secure the implant. Then blue light stimulation (470 nm) was performed at 20  
21 Hz with intervals of 5 ms for a total of 30 min in the mCherry and mCherry-ChR2  
22 groups. The light stimulation was conducted every three days and lasted for four or

1 eight weeks in mCherry and mCherry-ChR2 groups. Anxiety behavior tests and bone  
2 analysis were performed at the end of the paradigm. After the final light stimulation,  
3 mice were perfused with 4% PFA and brain tissues were removed for immunostaining  
4 analysis.

5

#### 6 *Trans-synaptic tracer labeling*

7 All animal procedures were performed in Biosafety level 2 (BSL2) animal facilities. To  
8 determine whether the BNST-VMH pathway was innervated by GABAergic neurons  
9 in the BNST, *SF1-Cre* mice (20–25 g) were used for trans-monosynaptic tracing based  
10 on the modified rabies virus. First, a mixture of AAV2/9-EF1a-FLEX-TVA-GFP and  
11 AAV2/9-EF1a-DIO-RV-G (1:1, total volume of 200 nl) was stereotaxically injected into  
12 the VMH region (AP=-1.58 mm; ML=±0.3 mm; DV=-5.35 mm). Mice were housed on  
13 a regular 12-hour light/dark cycle with food and water ad-libitum during recovery.  
14 Three weeks later, 200 nl of EnvA-pseudotyped rabies virus (EnvA-RV-DsRed) was  
15 injected into the VMH using the previously defined coordinates.

16

17 To verify the connectivity of BNST-VMH-NTS pathway, we modified the mono-  
18 synaptic rabies tracing strategy. On the first day, we injected a mixture of 200 nl  
19 AAV2/9-EF1a-Dio-histone-TVA-GFP and AAV2/9-EF1a-DIO-RV-G (1:1) into the  
20 VMH of *SF1-Cre* mice. Three weeks later, to allow the accumulation of SF1 neuronal  
21 TVA to be transported to axon terminals in the NTS (AP=-7.32 mm; ML=0.3 mm; and  
22 DV=-4.38 mm), we injected 200 nl of EnvA-RV-dsRed into the NTS of these mice.

1 Thus, we specifically infected NTS-projecting SF1 neurons and traced their inputs in  
2 the BNST. Mice were sacrificed 2 weeks after RV injection.

3

#### 4 *Chemogenetic inhibition of neurons*

5 For chemogenetic inhibition of the somatostatin neurons in the BNST, AAV5-DIO-  
6 hM4Di-mCherry ( $10^9$  TU/ml) or AAV-DIO-mCherry ( $10^9$  TU/ml) was injected  
7 bilaterally into the BNST (AP=-0.22 mm; ML= $\pm$ 0.75 mm; DV=4.5 mm) of *SOM-Cre*  
8 mice. Mice were housed for four weeks following injection for viral expression before  
9 initiation of experiments. Clozapine N-oxide (CNO) (1 mg/kg, sigma, C0832) or saline  
10 was delivered by intraperitoneal injection. Control saline injections contained an  
11 equivalent amount of Dimethyl sulfoxide (DMSO) (0.6%).

12

13 To selectively manipulate Vglut-2 neurons in the NTS innervated by SF1 neurons, we  
14 first bilaterally injected AAV1-Ef1 $\alpha$ -DIO-FLP (300 nl) into the VMH (AP=-1.58 mm;  
15 ML= $\pm$ 0.3 mm; and DV=-5.35 mm). Then, AAV-fDIO-hM4Di-eYFP virus was injected  
16 into the NTS (AP=-7.32 mm; ML=0.3 mm; and DV=-4.38 mm) during the same surgery.  
17 After the injection, the needle was kept in place for 10 min for virus diffusion purposes  
18 and then slowly withdrawn. Following surgery, mice were placed under a heat lamp  
19 until anesthesia had worn off. Lincomycin hydrochloride and lidocaine hydrochloride  
20 gel were applied to the sterilized incision site as an analgesic and anti-inflammatory  
21 drug. Mice were given two to three weeks after surgery to recover.

22

1 To investigate the role of TH-positive neural terminals in bone metabolism, we injected  
2 500 nl AAV2/9-DIO-hM4Di-mCherry or AAV2/9-DIO-mCherry into bone marrow  
3 cavity of *TH-Cre* mice to selectively label local TH terminals. Six weeks after the virus  
4 injection, CNO (1mg/kg) was delivered by intraperitoneal injection every three days  
5 for four weeks. At the end of the stimulation, Micro-CT scanning and analysis were  
6 performed on the collected samples.

7

### 8 *Immunostaining*

9 Brains were fixed in 4% paraformaldehyde (PFA) at 4 °C overnight and cryosectioned  
10 at a thickness of 20 µm. Sections were then rehydrated and blocked by goat serum. The  
11 sections were incubated with primary antibodies to SF1 (1:500, Abcam, ab65815),  
12 GAD65 (1:500, Abcam, ab11070), Vglut2 (1:400, Abcam, ab79157), TH (1:500, Sigma,  
13 T8700), Parvalbumin (1:500, Millipore, MAB1572), Somatostatin (1:500, Millipore,  
14 AB5494), Cholecystokinin (1:500, Abcam, ab27441), c-fos (1:500,  
15 Cell Signaling Technology, mAb2250) or TPH2 (1:500, Sigma, ABN60). The sections  
16 were then washed and labeled with fluorescence-conjugated corresponding secondary  
17 antibodies (Jackson ImmunoResearch, 111-545-003, 315-545-003). The sections were  
18 counterstained with Hoechst 33342 and then mounted for image acquisition. Images  
19 were taken under a microscope (ECLIPSE 50i, Nikon, Melville, NY, USA). The  
20 number of c-fos positive cells in the BNST and other regions were counted in eight  
21 sections (three adjacent levels) from each mouse, and each group contained three mice.  
22 The mean cell number per section was compared with the different experimental groups

1 during data analyses.

2

3 Mice tibia from different groups were isolated at four or eight weeks after light  
4 stimulation in optogenetic study or CNO administration in chemogenetic study. Tissue  
5 samples were fixed in 4% PFA for 48 hours at 4 °C and then decalcified in 4%  
6 ethylenediaminetetraacetic acid (EDTA) for 30 days. Following decalcification, tibiae  
7 were dehydrated by gradient ethanol (70% ethanol for 2 hr, twice; 95% ethanol for 2 hr,  
8 twice; 100% ethanol for 2 hr, three times) and xylene (2 hr, 3 times) and then embedded  
9 in paraffin and sectioned at 7 µm thickness. For immunostaining, cryosections of tibia  
10 were rehydrated and then incubated with primary TH antibody (1:500, Sigma, T8700),  
11 ALP (1:200, Abcam, ab95462), RANKL (1:500, Santa Cruz, Sc-52950) for 60 min and  
12 then washed and labeled with fluorescent secondary antibody (Jackson  
13 ImmunoResearch, 111-545-003, 315-545-003) or HRP secondary antibody (Cell  
14 Signaling Technology, 7074, 7076). Tartrate-resistant acid phosphatase (TRAP)  
15 staining was performed using a commercial kit (Sigma, 387A-1KT). Sections under  
16 immunofluorescence staining were counterstained with Hoechst 33342 and then  
17 mounted for image acquisition. Sections under immunohistochemistry staining were  
18 then incubated with ImmPACT DAB EqV Substrate (SK-4103, Vector laboratories) and  
19 then counter stained with Harris Hematoxylin (20 mins). The number of ALP, RANKL  
20 and TRAP positive cells in the bone tissues were counted in three sections from each  
21 mouse, and each group contained three mice. Tibia cartilage was stained with 1%  
22 Safranin O (10 mins) and washed with 1% acetic ethanol followed with 0.02% Fast

1 Green counterstaining (1 min). Hematoxylin & Eosin (HE) staining was performed  
2 separately on consecutive tissue sections and images were taken using a microscope  
3 (ECLIPSE 50i, Nikon, Japan).

4

#### 5 *In situ hybridization*

6 We used single-probe in situ hybridization on fixed frozen sections. Coding region  
7 fragments of *somatostatin* were isolated from mouse brain cDNA using PCR and cloned  
8 into pCR4 Topo vector (Thermo Fisher). DIG RNA Labeling Kit (11277073910, Roche)  
9 was used to prepare Digoxigenin (DIG)-labeled riboprobes. Brain sections were  
10 hybridized to DIG-labeled cRNA probes at 56 °C for 14–16 hr. After hybridization,  
11 sections were washed twice in 0.2 x SSC at 65 °C for 20 min and then incubated with  
12 horseradish peroxidase (POD)-conjugated sheep anti-DIG antibodies (1:300;  
13 1207733910, Roche) diluted in blocking buffer (1% Blocking reagent, FP1012, Perkin  
14 Elmer) for 45 min at room temperature (RT). Then, sections were washed three times  
15 for five min at RT in PBST (0.05% Tween 20 in 1 X PBS) wash buffer, and treated  
16 using a TSA-plus Cy5 kit (1:100; NEL745001KT, Perkin Elmer) for 10 min at RT.  
17 Sections were washed twice for five min at RT in PBST and then incubated with Anti-  
18 RFP antibody (1:200; ab62341, Abcam) for 1.5 hr at RT, and washed. Sections were  
19 incubated with Alexa Fluor 488-conjugated goat anti-rabbit IgG antibodies (1:200; 111-  
20 547-003, Jackson Immuno Research) for 1 hr at RT. Sections were mounted in  
21 Fluoromount-G (0100-20, Southern Biotech) and imaged using LSM 880 confocal  
22 microscope (Zeiss, LSM880).

1 *Electrophysiology*

2 Procedures for preparing acute brain slices and performing whole-cell recordings with  
3 optogenetic stimulations were similar to those described previously. Coronal slices  
4 (300–400  $\mu\text{M}$ ) were prepared using a vibratome (VT-1000S, Leica) in an ice-cold  
5 choline-based solution containing 110 mM choline chloride, 2.5 mM KCl, 0.5 mM  
6  $\text{CaCl}_2$ , 7 mM  $\text{MgCl}_2$ , 1.3 mM  $\text{NaH}_2\text{PO}_4$ , 1.3 mM Na-ascorbate, 0.6 mM Na-pyruvate,  
7 20 mM glucose and 2.5  $\text{NaHCO}_3$ , saturated with 95%  $\text{O}_2$  and 5%  $\text{CO}_2$ . Slices were  
8 incubated in 32 °C oxygenated artificial cerebrospinal fluid (125 mM NaCl, 2.5 mM  
9 KCl, 2 mM  $\text{CaCl}_2$ , 1.3 mM  $\text{MgCl}_2$ , 1.3 mM  $\text{NaH}_2\text{PO}_4$ , 1.3 mM Na-ascorbate, 0.6 mM  
10 Na-pyruvate, 10 mM glucose and 2.5 mM  $\text{NaHCO}_3$ ) for at least 1 h before recording.  
11 Slices were transferred to a recording chamber and superfused with 2 ml/min artificial  
12 cerebrospinal fluid. Patch pipettes (4–7  $\text{M}\Omega$ ) pulled from borosilicate glass (PG10150-  
13 4, World Precision Instruments) were filled with internal solution containing 35 mM K-  
14 gluconate, 10 mM HEPES, 0.2 mM EGTA, 5 mM QX-314, 2 mM Mg-ATP, 0.1 mM  
15 Na-GTP, 8 mM NaCl, at 280~290  $\text{mOsmkg}^{-1}$  and adjusted to pH 7.3 with KOH.  
16 Whole-cell voltage-clamp recording of SF1 neurons was performed at RT (22–25 °C)  
17 with a Multiclamp 700B amplifier and a Digidata 1440A (Molecular Devices). Data  
18 were sampled at 10 kHz and analyzed with pClamp10 (Molecular Devices) or  
19 MATLAB (MathWorks).

20

21 The eYFP-expressing SF-1 neurons in the VMH were visualized using an upright  
22 fluorescent microscope (Nikon FN-S2N). Blue light from a DG4 (Lambda, Sutter



1 Instrument Company) (470 nm) controlled by digital commands from a Digidata 1440A  
2 was coupled to the microscope with an adaptor to deliver photo stimulation. To record  
3 light-evoked IPSCs, 20 s of 0.5–2 mW blue light was delivered through the objective  
4 to illuminate the entire field of view. The experiment was performed in the presence of  
5 AMPA receptor antagonist NBQX (50  $\mu$ M) and NMDA receptor antagonist AP5 (50  
6  $\mu$ M). Both the frequency and amplitude of IPSCs were analyzed in the presence of  
7 bicuculine (50  $\mu$ M).

8

#### 9 *MicroCT analysis*

10 The proximal tibia of mice in different experimental groups were scanned and analyzed  
11 using a SkyScan 1076 Micro-CT system and software (SkyScan, Kontich, Belgium)  
12 with a pixel size of 9  $\mu$ m, voltage of 50 kV, exposure time of 1018 ms, frame averaging  
13 on and beam filtration filter 1.0 mm aluminum. After scanning, knee joints were three-  
14 dimensionally reconstructed by Sky-Scan recon software. A cuboid of trabecular bone  
15 beneath the growth plate with size of 1.15 x 1.15 x 0.58 mm<sup>3</sup> was selected. Percentage  
16 bone volume (BV/TV, %), trabecular number (Tb N, 1/mm), trabecular separation  
17 (Tb.Sp, mm), and connectivity density (Conn.D, 1/mm<sup>3</sup>) were calculated for the tibia  
18 trabecular bone using CT-Analysis with thresholding of 60-255. Additionally,  
19 diagrammatic images were generated by CT-Volume with a well-established protocol.

20

#### 21 *Microdialysis*

22 Mice from different groups were anesthetized with sodium pentobarbital (100 mg/kg)

1 and placed in a stereotaxic frame. A microdialysis probe (MER-10 mm guide, 2 mm  
2 membrane, Bioanalytical Systems Inc.) was implanted into the ventromedial  
3 hypothalamus (VMH) region (AP=-1.58 mm; ML=±0.3 mm; DV=-5.35 mm). The  
4 probe was perfused with artificial cerebrospinal fluid (ACSF) (124 mM NaCl, 3 mM  
5 KCl, 2.4 mM CaCl<sub>2</sub>, 1.3 mM MgSO<sub>4</sub>, 10 mM glucose, and 10 mM HEPES; pH=7.3)  
6 for 90 min before collecting samples. Samples were collected for 30 min during the  
7 experiment. GABA or CART concentrations in the dialysate were determined using an  
8 ELISA Kit and the experiments were carried out according to the manufacturers'  
9 instructions (MyBioSource, MBS776216 and QCHENG BIO, QC-CART-Mu-96T).  
10 The concentrations of GABA or CART were determined, normalized to that of the  
11 control group, and compared to those from the different experimental groups.

12

### 13 *ELISA tests*

14 For the human study, concentrations of Procollagen I carboxy-terminal propeptide  
15 (PICP) and alkaline phosphatase (ALP) in the serum were determined using ELISA  
16 Kits (Lianshuo Biological, Shanghai, China, AE90738Hu and AE91640Hu). Cortisol,  
17 epinephrine, norepinephrine (NE) in the serum were also determined using ELISA Kits  
18 (MyBioSource, USA, MBS036035, MBS268196 and MBS2602530). Experiments  
19 were carried out by Kingmed diagnostics (Guangzhou, China) according to  
20 manufacturer instructions.

21

22 For mice studies, serum samples were collected for biochemical determination at

1 different time points during the stress protocol. Cortisol (MyBioSource, MBS704879),  
2 NE (MyBiosource, MBS776673), ALP (MyBiosource, MBS725505 or Abcam,  
3 Ab8337), C-terminal peptide of mouse type I collagen (CTx1, KESHUN Bion,  
4 Shanghai, KS17310-96T), Receptor Activator of Nuclear Factor- $\kappa$  B Ligand (RANKL,  
5 Abcam, Ab100749), Alkaline Phosphatase (ALP, Abcam, Ab8337), Osteoprotegerin  
6 (Abcam, Ab203365) in the serum were assessed by ELISA kits.

7

### 8 *Animal behavior studies*

9 All mice were handled for 15-30 min per day for three days before behavioral assays to  
10 reduce stress introduced by contact with experimenter. The elevated plus maze test and  
11 open-field test are widely used behavioral assays for measuring anxiety in rodents. The  
12 elevated plus maze was made of plastic and consisted of two white open arms ( $25 \times 5$   
13 cm) and two white enclosed arms ( $25 \times 5 \times 15$  cm) extending from a central platform  
14 ( $5 \times 4$  cm) at  $90^\circ$  to form a plus shape. The maze was placed 65 cm above the floor. A  
15 camera was set directly above the EPM apparatus for video recording. Mice were  
16 individually placed in the center, with their heads facing a closed arm. The number of  
17 entries and amount of time spent in the same type of arms were recorded during 5 min  
18 sessions.

19

20 The open-field test consisted of a 10 min session in an open-field chamber ( $50 \times 50$  cm),  
21 which was made of plastic and was conceptually divided into a central field (center,  $25$   
22  $\times 25$  cm) and a peripheral field for analysis purposes. Each individual mouse from the

1 different experimental groups was placed in the peripheral field at the start of the test.  
2 Behaviors were recorded on video during the trials and the ANY-maze video tracking  
3 system (Stoelting, USA) was used for analysis.

4

#### 5 *Bone marrow mesenchymal stem cell differentiation*

6 Bone marrow mesenchymal stem cells (BMSC) was collected by flushing the femur of  
7 normal C57 mice at 4 weeks old with sterile PBS with 2% FBS (Invitrogen). The cells  
8 were centrifuged for 15 min at 1200 g at room temperature. Cells were re-suspended in  
9 10 mL of growth medium (DMEM supply with 10% FBS, 1% penicillin/streptomycin,  
10 1% L-glutamine). Cell numbers were determined with a hemocytometer.

11

12 Osteogenesis was induced by incubation of DMEM with 5% FBS supplemented with  
13  $10^{-8}$  mol/L dexamethasone, 0.2 mmol/L ascorbic acid and 10 mmol/L  $\beta$ -glycerol  
14 phosphate for two weeks. To investigate the effects of stress on osteogenesis, we  
15 employed an osteogenesis assay kit to induce osteogenic differentiation of BMSC  
16 (Cyagen, Guangzhou, China, MUBMX-90021). Serum of control and stress mice (1:5)  
17 were supplied to the medium during the induction stage of cells. Medium ALP was  
18 assessed by Alkaline Phosphatase Fluorometric Assay Kit (abcam, ab8337). The cells  
19 were collected on the 14<sup>th</sup> day for the assessment of RNA expression of *Runx2*, *Alp*,  
20 *Opn*, *Colla1* by RT-qPCR. Cultures were stained with Alizarin red solution for  
21 microscope imaging.

22

1 *Gene expression analysis using RT-PCR*

2 RT-PCR was conducted using a Light Cycler VR 480 (Roche, Switzerland) according  
3 to standard Taqman or SYBR® Green technology procedure employing fluorescence  
4 monitoring. For single cell RT-PCR, at the end of each recording, cytoplasm was  
5 aspirated into the patch pipette and expelled into a PCR tube. The single cell RT-PCR  
6 protocol was designed to detect the presence of mRNAs coding for *SF-1*, *Vglut2*, *Vgat*  
7 and *18S*. Commercialized predesigned gene-specific primers and probes (Applied  
8 Biosystems) for *SF-1* (Mm00446826\_m1), *Vglut2* (Mm00499876\_m1), *Vgat*  
9 (Mm00494138\_m1), and *18S rRNA* control reagents (Mm03928990\_g1) were obtained  
10 from ThermoFisher Scientific, and we used Single Cell-to-CTTM Kit (ambion,  
11 ThermoFisher Scientific) at a final reaction volume of 50 µl/well in 96-well plates. All  
12 procedures were conducted according to the manufacturer's protocol.

13

14 For osteogenic differentiated BMSC induced by serum of control and stressed mice, or  
15 freshly isolated BMSC from the control and stress groups, reverse transcription and  
16 PCR amplification were performed using ReverTra Ace qPCR RT kit (TOYOBO, FSQ-  
17 101) and SYBR® Green Realtime PCR Master Mix (TOYOBO, QPK-201),  
18 respectively. Primers: *Runx2*: 5'GGGCACAAGTTCTATCTGGAAAA3',  
19 5'CGTGTCACTGCGCTGAA3' (Final product 71 bp); *ALP*:  
20 5'GCCCTCTCCAAGACATATA3', 5'CCATGATCACGTCGATATCC3' (Final  
21 product 373 bp); *OPN*: 5'GAAACTCTTCCAAGCAATTC3',  
22 5'GGACTAGCTTGTCTTGTGG3' (Final product 589 bp); *Colla1*:

1 5'GGTGAACAGGGTGTTCTGG3', 5'TTCGCACCAGGTTGGCCATC3' (Final  
2 product 503 bp); *Gapdh*: 5'GCATGGCCTTCCGTGTTTC3',  
3 5'CCTGCTTCACCACCTTCTTGAT3' (Final product 105 bp) was used as an internal  
4 control to normalize RNA content. For *CART* expression in the VMH of stressed or  
5 control mice, *CART*: 5'TACTCTGCCGTGGATGATGCGT3', 5'  
6 TCGGAATGCGTTTACTCTTGAGC3' (Final product 91 bp) were used as the primers.  
7 The experiments were carried out according to the manufacturers' instructions.
